# Supplementary material for: Structural and electronic properties of KY(BH4)4: DFT+U study
Source: Royal Society of Chemistry journal article supplement (doi:10.1039/c8ra06742b), 2018-01-01
Supplement: c8ra06742b1.pdf [file c8ra06742b1.pdf]

**Electronic Supplementary Information**

**To**

**Structural and electronic properties of KY(BH<sub>4</sub>)<sub>4</sub>: DFT + U study**

Chuan Liu<sup>\*a</sup>, Ting Zhang<sup>a</sup>, Xiangju Ye<sup>a</sup>, Xuemei Zhang<sup>a</sup>, Shengli Zhang<sup>b</sup>

<sup>a</sup> College of Chemistry and Materials Engineering, Anhui Science and Technology University, Fengyang, Anhui Province, 233100, China

<sup>b</sup> Institute of Optoelectronics & Nanomaterials Herbert Gleiter Institute of Nanoscience, College of Materials Science and Engineering, Nanjing University of Science and Technology, Nanjing, 210094, China

*E-mail: [liuxc@ahstu.edu.cn](mailto:liuxc@ahstu.edu.cn)*

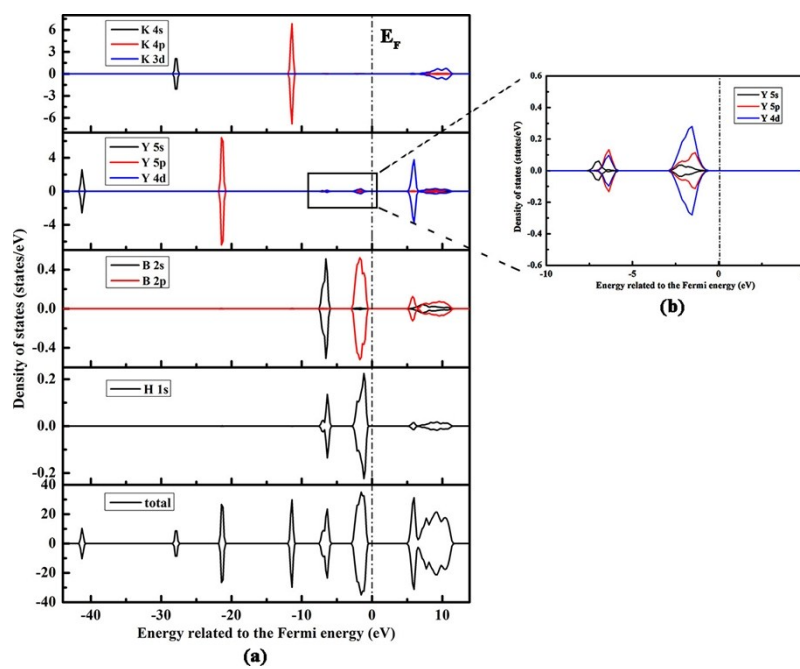

**Fig. S1** The calculated total and partial density of states of KY(BH<sub>4</sub>)<sub>4</sub> by the PBE + U method at U = 3 eV, and the Fermi energy is set to zero.

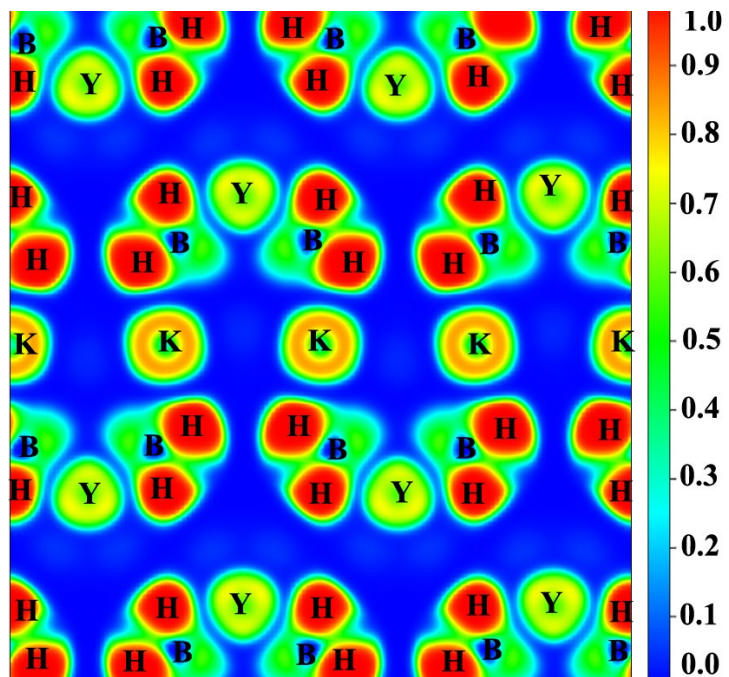

**Fig. S2** The calculated ELF of KY(BH<sub>4</sub>)<sub>4</sub> by the PBE + U method at U = 3 eV.

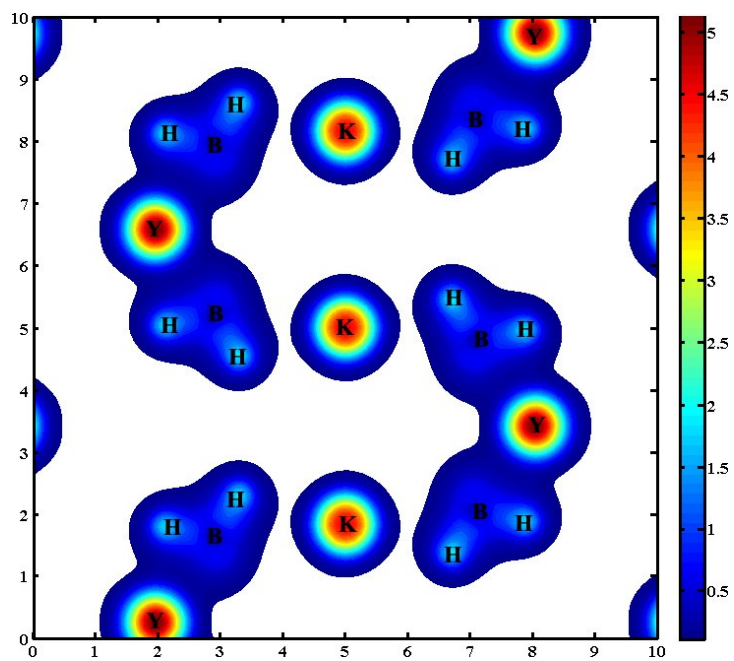

**Fig. S3** The calculated total charge density of  $\text{KY}(\text{BH}_4)_4$  by the PBE + U method at  $U = 3 \text{ eV}$ .
